# Supplementary material for: Heart Team Intervention for Calcified Left Main Coronary Disease and Jeopardized Left Internal Mammary Artery Graft
Source: Hindawi journal article supplement (doi:10.1155/2022/7712888), 2022-06-22
Supplement: f1 [file 7712888.f1.pdf]

**CARE Checklist of information to include when writing a case report**

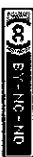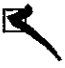

| Topic                 | Item                     | Checklist item description                                                               | Reported on Line                                                                                             |                                                                                                              |                                                                                                             |                                                                                                  |                                                                                            |                 |
|-----------------------|--------------------------|------------------------------------------------------------------------------------------|--------------------------------------------------------------------------------------------------------------|--------------------------------------------------------------------------------------------------------------|-------------------------------------------------------------------------------------------------------------|--------------------------------------------------------------------------------------------------|--------------------------------------------------------------------------------------------|-----------------|
| Title                 | 1                        | The diagnosis or intervention of primary focus followed by the words "case report" ..... | Paragraph 2                                                                                                  |                                                                                                              |                                                                                                             |                                                                                                  |                                                                                            |                 |
|                       | Key Words                | 2                                                                                        | 2 to 5 key words that identify diagnoses or interventions in this case report, including "case report" ..... | Paragraph 39-40                                                                                              |                                                                                                             |                                                                                                  |                                                                                            |                 |
|                       |                          | Abstract (no references)                                                                 | 3a                                                                                                           | Introduction: What is unique about this case and what does it add to the scientific literature? .....        | Paragraph 58-60                                                                                             |                                                                                                  |                                                                                            |                 |
|                       |                          |                                                                                          | 3b                                                                                                           | Main symptoms and/or important clinical findings .....                                                       | Paragraph 45-50                                                                                             |                                                                                                  |                                                                                            |                 |
|                       |                          |                                                                                          | 3c                                                                                                           | The main diagnoses, therapeutic interventions, and outcomes .....                                            | Paragraph 51-58                                                                                             |                                                                                                  |                                                                                            |                 |
|                       |                          |                                                                                          | Introduction                                                                                                 | 3d                                                                                                           | Conclusion—What is the main "take-away" lesson(s) from this case? .....                                     | Paragraph 60-62                                                                                  |                                                                                            |                 |
|                       |                          |                                                                                          |                                                                                                              | 4                                                                                                            | One or two paragraphs summarizing why this case is unique (may include references) .....                    | Paragraph 74-75                                                                                  |                                                                                            |                 |
|                       |                          |                                                                                          |                                                                                                              | Patient Information                                                                                          | 5a                                                                                                          | De-identified patient specific information .....                                                 | Paragraph 79                                                                               |                 |
|                       |                          |                                                                                          |                                                                                                              |                                                                                                              | 5b                                                                                                          | Primary concerns and symptoms of the patient .....                                               | Paragraph 79                                                                               |                 |
|                       |                          |                                                                                          |                                                                                                              |                                                                                                              | 5c                                                                                                          | Medical, family, and psycho-social history including relevant genetic information .....          | Paragraph 80                                                                               |                 |
|                       |                          |                                                                                          |                                                                                                              |                                                                                                              | 5d                                                                                                          | Relevant past interventions with outcomes .....                                                  | Paragraph 80-84                                                                            |                 |
|                       |                          |                                                                                          |                                                                                                              |                                                                                                              | Clinical Findings                                                                                           | 6                                                                                                | Describe significant physical examination (PE) and important clinical findings .....       | Paragraph 85-87 |
|                       |                          |                                                                                          |                                                                                                              |                                                                                                              |                                                                                                             | 7                                                                                                | Historical and current information from this episode of care organized as a timeline ..... | N/A             |
| Diagnostic Assessment |                          |                                                                                          |                                                                                                              |                                                                                                              |                                                                                                             | 8a                                                                                               | Diagnostic testing (such as PE, laboratory testing, imaging, surveys) .....                | Paragraph 85-91 |
|                       | 8b                       |                                                                                          |                                                                                                              |                                                                                                              |                                                                                                             | Diagnostic challenges (such as access to testing, financial, or cultural) .....                  | N/A                                                                                        |                 |
|                       | 8c                       | Diagnosis (including other diagnoses considered) .....                                   |                                                                                                              |                                                                                                              |                                                                                                             | Paragraph 91                                                                                     |                                                                                            |                 |
|                       | 8d                       | Prognosis (such as staging in oncology) where applicable .....                           |                                                                                                              |                                                                                                              |                                                                                                             | N/A                                                                                              |                                                                                            |                 |
|                       | Therapeutic Intervention | 9a                                                                                       |                                                                                                              |                                                                                                              |                                                                                                             | Types of therapeutic intervention (such as pharmacologic, surgical, preventive, self-care) ..... | Paragraph 118                                                                              |                 |
|                       |                          | 9b                                                                                       | Administration of therapeutic intervention (such as dosage, strength, duration) .....                        |                                                                                                              |                                                                                                             | Paragraph 131                                                                                    |                                                                                            |                 |
|                       |                          | 9c                                                                                       | Changes in therapeutic intervention (with rationale) .....                                                   |                                                                                                              |                                                                                                             | Paragraph 134-135                                                                                |                                                                                            |                 |
|                       |                          | Follow-up and Outcomes                                                                   | 10a                                                                                                          | Clinician and patient-assessed outcomes (if available) .....                                                 |                                                                                                             | N/A                                                                                              |                                                                                            |                 |
|                       |                          |                                                                                          | 10b                                                                                                          | Important follow-up diagnostic and other test results .....                                                  |                                                                                                             | Paragraph 136-137                                                                                |                                                                                            |                 |
|                       |                          |                                                                                          | 10c                                                                                                          | Intervention adherence and tolerability (How was this assessed?) .....                                       |                                                                                                             | Paragraph 137-139                                                                                |                                                                                            |                 |
|                       |                          |                                                                                          | 10d                                                                                                          | Adverse and unanticipated events .....                                                                       |                                                                                                             | N/A                                                                                              |                                                                                            |                 |
|                       |                          |                                                                                          | Discussion                                                                                                   | 11a                                                                                                          | A scientific discussion of the strengths AND limitations associated with this case report .....             | Paragraph 173-179                                                                                |                                                                                            |                 |
|                       |                          |                                                                                          |                                                                                                              | 11b                                                                                                          | Discussion of the relevant medical literature with references .....                                         | Paragraph 155-172                                                                                |                                                                                            |                 |
| 11c                   |                          |                                                                                          |                                                                                                              | The scientific rationale for any conclusions (including assessment of possible causes) .....                 | Paragraph 155-172                                                                                           |                                                                                                  |                                                                                            |                 |
| 11d                   |                          |                                                                                          |                                                                                                              | The primary "take-away" lessons of this case report (without references) in a one paragraph conclusion ..... | Paragraph 173                                                                                               |                                                                                                  |                                                                                            |                 |
| Patient Perspective   |                          |                                                                                          |                                                                                                              | 12                                                                                                           | The patient should share their perspective in one to two paragraphs on the treatment(s) they received ..... | Paragraph 139                                                                                    |                                                                                            |                 |
|                       |                          |                                                                                          |                                                                                                              | Informed Consent                                                                                             | 13                                                                                                          | Did the patient give informed consent? Please provide if requested .....                         | Yes <input checked="" type="checkbox"/> No <input type="checkbox"/>                        |                 |
